# Supplementary material
Source: publisher figshare collection journal article supplement (https://sage.figshare.com/ndownloader/files/13085984)
Supplement: Supplementary file 1 [file 13085984]

Appendix E: Mid-Semester and Final Course Feedback

**Mid-Semester Course Feedback**

Please be honest with your responses. No names required! And, please strongly consider what helps you learn the best when answering the questions.

**Which aspects of this course do you find most helpful to facilitate your learning of the material?**

**What aspects of the course do you feel could be improved upon?**

**Do you find the popular press books helpful to facilitate your learning (please circle)?** Yes No

**In what ways do the popular press books do or do not facilitate your learning?**

**Do you find the research articles helpful to facilitate your learning (please circle)?** Yes No

**In what ways do the popular press books do or do not facilitate your learning?**

**Do you feel the way your learning is assessed in this course (reading responses, tests, paper/presentation) are fair? What, if anything, would you change about them?**

**Would you have preferred to use a standard textbook in this course in place of the popular press books and research articles (please circle)?**

Yes No

**Please elaborate on your choice.**

**Would you have preferred to have multiple choice exams in this course in place of written responses (please circle)?**

Yes No

**Please elaborate on your choice.**

**Any additional comments you’d like to share not addressed above:**

**Final Semester Course Feedback**

Please be honest with your responses. No names required! And, please strongly consider what helps you learn the best when answering the questions.

**Which aspects of this course have you found most helpful to facilitate your learning of the material?**

**What aspects of the course do you feel could be improved upon in future iterations?**

**Did you find the popular press books helpful to facilitate your learning (please circle)?** Yes No

**In what ways did the popular press books facilitate or did not facilitate your learning?**

**Did you find the research articles helpful to facilitate your learning (please circle)?** Yes No

**In what ways did the popular press books facilitate or did not facilitate your learning?**

**Did you find the selected disease assignment helpful to facilitate your learning (please circle)?** Yes No

**In what ways did the selected disease assignment facilitate or did not facilitate your learning?**

**Do you feel the way your learning has been assessed in this course (reading responses, tests, paper/presentation) are fair? What, if anything, would you change about them?**

**Would you have preferred to use a standard textbook in this course in place of the popular press books and research articles (please circle)?**

Yes No

**Please elaborate on your choice.**

**Would you have preferred to have multiple choice exams in this course in place of written responses (please circle)?**

Yes No

**Please elaborate on your choice.**

**Any additional comments you’d like to share not addressed above?**
